# Supplementary material
Source: PubMed Central journal article supplement (PMC6556643)
Supplement: ajtr0011-3150-f5.pdf [file ajtr0011-3150-f5.pdf]

Sodium demethylcantharidate-induced ER stress-mediated HCC apoptosis

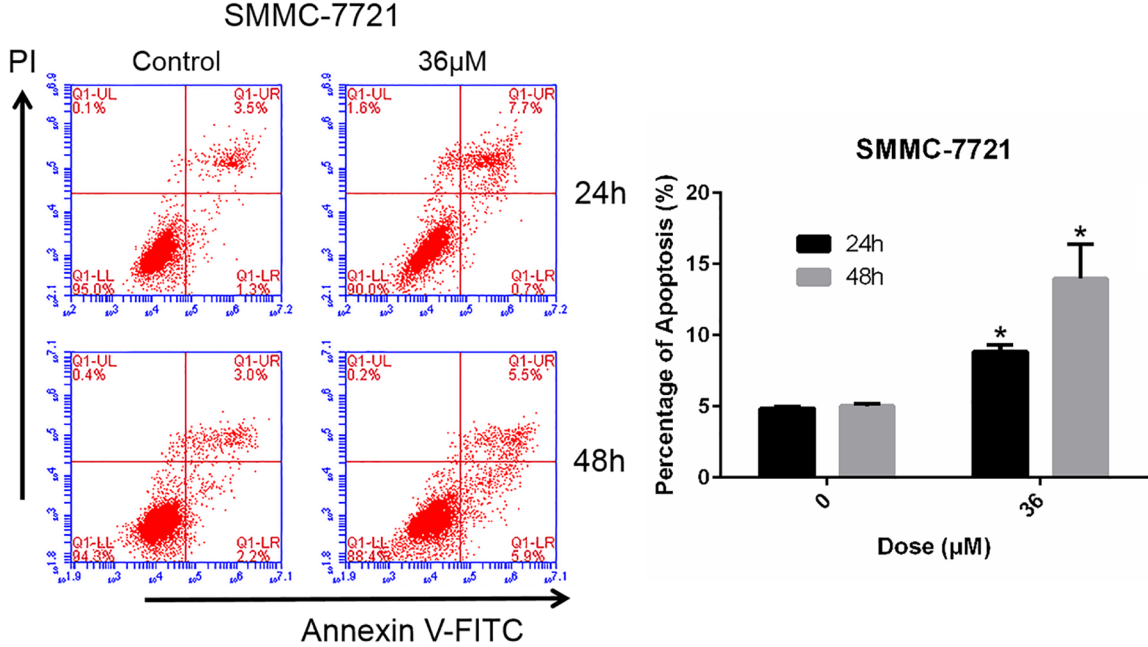

**Figure S1.** Sodium demethylcantharidate induced apoptosis in SMMC-7721 cells, related to **Figure 2**. SMMC-7721 cells were treated with sodium demethylcantharidate (0 or 36 µM) for 24 h or 48 h. Apoptosis was measured via Annexin V/propidiumiodide (PI) staining and quantified by flow cytometry. The experiments were repeated at least three times. The data are expressed as the means ± SD of three experiments (\**P*<0.05 vs. control).
